# Supplementary material for: Inactivated vaccine injection and immunoglobulin G levels related to severe coronavirus disease 2019 (Delta) pneumonia in Xi’an, China: A single-centered, retrospective, observational study
Source: Front Cell Infect Microbiol. 2022 Aug 23;12:933100. doi: 10.3389/fcimb.2022.933100 (PMC9446153; doi:10.3389/fcimb.2022.933100)
Supplement: Supplementary file 2 [file Table_2.xls]

## Sheet: Sheet4
Table S2 Laboratory tests and types of diagnosis grouped by vaccination and IgG levels and comorbidities.
Variables		Non-morbidities						Co-morbidities					p value
		unvaccine, n=41	Vac+IgG-, n=89	Vac+IgG+, n=348	total, n=478	p value		unvaccine, n=19	Vac+IgG-, n=26	Vac+IgG+, n=57	total, n=102	p value
Laboratory Examination on Admission
Blood routine
	Lymphocytes,1.1‐3.2×109/L	1.29(0.82-1.73)	1.28(0.94-1.65)	1.28(0.98-1.76)	1.28(0.96-1.75)	0.576		1.06(0.83-1.21)	1.33(0.76-1.77)	1.07(0.9-1.65)	1.08(0.87-1.60)	0.286	0.018
	Monocytes,0.1-0.6×109/L	0.34(0.28-0.43)	0.46(0.37-0.56)	0.39(0.3-0.51)	0.4(0.31-0.52)	<0.001		0.44(0.29-0.67)	0.45(0.4-0.6)	0.47(0.32-0.57)	0.46(0.34-0.6)	0.755	0.006
	Neutrophils,1.8‐6.3×109/L	2.70(2.12-3.58)	3.3(2.54-4.48)	2.82(2.16-3.66)	2.86(2.18-3.78)	0.001		2.63(2.17-3.63)	3.97(2.2-5.18)	3.39(2.48-3.88)	3.2(2.29-4.13)	0.137	0.043
	Platelets,125‐350.0×109/L	179(151-207)	203.5(169.5-245)	194.5(158.5-234.5)	195(159-235)	0.026		181.0(149.0-228.0)	206(140-231)	207(149-260)	205(148-243)	0.709	0.9
	Leukocytes, 3.5‐9.5×109/L	4.63(3.65-5.58)	5.24(4.08-6.5)	4.71(3.85-5.77)	4.81(3.88-5.87)	0.009		4.13(3.60-5.09)	5.46(4.07-7.14)	5.08(4.08-5.94)	5.03(4.06-6.01)	0.085	0.319
	Hemoglobin,115-150g/L	135.0(123-146)	148(133.5-159)	140(127-152.5)	141(127-153)	0.000884386		137(124-157)	149(141-160)	140(127-155)	143(130-157)	0.084	0.149
Flow cytometry
	CD4+/CD8+	0.96(0.36-1.49)	1.35(1-1.65)	1.23(0.99-1.63)	1.22(0.94-1.60)	0.013		1.49(0.89-2.53)	0.91(0.76-1.49)	1.21(1.04-1.66)	1.22(0.89-1.66)	0.203	0.676
	CD16+56+ NK cells,150-900/ul	192(111.5-250.5)	204(142-365)	178(126-262)	184(132-276)	0.0333954		128(136-395)	291(188.5-373)	197.5(137-279)	202(138.5-353.5)	0.399	0.082
	CD19+ B cells,90-580/ul	116(79-204)	143(99-218)	149.5(104-223)	144.0(96.5-215.5)	0.185923		113(54-148)	94(69-144)	113(85-194)	108(80-159.5)	0.444	0.003
	CD8+ T cells,190-1140/ul	492(224-691)	325(249-552)	409(292-587)	407(276-600)	0.0422902		266(169-383)	385(284.5-662.5)	332.5(242-538)	314(242.0-498.0)	0.076	0.017
	CD4+ T cells,410-1590/ul	350(220-548)	441(329-603)	477(354-661)	463(346-643)	0.0422902		360(281-484)	390(227.5-596)	460.5(291-635)	393(277-635)	0.602	0.091
	CD3+ T cells,690-2540/ul	941(608-1291)	778(655-1092)	910.5(670-1269)	903.0(659-1273)	0.263474		667(538-739)	937(521.5-1095)	870.5(508-1174)	756(525-1099)	0.362	0.007
Coagulation function
	D‐dimer,0-1 ug/ml	0.47(0.39-0.55)	0.39(0.34-0.46)	0.43(0.37-0.52)	0.42(0.36-0.52)	<0.001		0.55(0.43-0.61)	0.40(0.35-0.59)	0.45(0.38-0.52)	0.45(0.37-0.57)	0.108	0.099
	Prothrombin time,11.8-15.1s	13.2(12.5-14.5)	13.1(12-14.4)	13.5(12.5-14.4)	13.4(12.3-14.4)	0.154		13.1(11.6-14.6)	13.7(11.9-14.4)	13.2(12.4-14.5)	13.2(12.3-14.5)	0.779	0.598
	Activated partial thromboplastin time,25.4-38.4s	32.2(32.3-34.1)	31.9(29.5-34.0)	32.3(30.4-34.2)	32.2(30.2-34.1)	0.517		31.9(29.7-34.3)	31.9(29.8-33.8)	31.2(29.4-33.3)	31.4(29.5-33.4)	0.574	0.093
	International Normalized Ratio,0.7-1.4	1.03(0.96-1.15)	1.02(0.92-1.14)	1.06(0.96-1.14)	1.05(0.94-1.14)	0.155		1.02(0.88-1.16)	1.07(0.91-1.14)	1.03(0.95-1.15)	1.03(0.94-1.14)	0.777	0.584
Blood biochemistry
	Albumin,40-55g/L	45.8(44.5-48.3)	47.3(45.4-49.5)	46.7(44.6-48.6)	46.7(44.6-48.8)	0.057		44.7(40.4-48.7)	45.8(43.0-48.1)	46.0(44.1-48.7)	46.0(43.1-48.6)	0.416	0.055
	Alkaline phosphatase, 45-125IU/L	63.0(53.0-80.0)	72.5(58.5-89.0)	65.0(54.0-79.0)	66.0(55.0-81.0)	0.013		74.5(54.3-95.3)	76.5(63.5-86.5)	68.0(55.0-82.0)	72.0(57.0-85.0)	0.506	0.064
	Alanine aminotransferase,9-50IU/L	29.0(23.0-36.0)	30.0(27.0-42.5)	29.0(23.0-41.0)	30.0(24.0-41.0)	0.174		36.0(26.8-49.8)	32.0(27.0-45.0)	38.0(28.0-46.0)	34.0(27.3-47.0)	0.781	0.000671969
	Glutamyltransferase,10-60IU/L	16.0(12.0-31.0)	18.0(13.0-31.5)	18.0(12.0-27.0)	18.0(12.0-29.0)	0.613		26.5(21.0-52.8)	21.0(14.5-28.5)	20.0(13.0-36.0)	22.0(14.0-36.0)	0.095	0.003
	Aspartate aminotransferase, 15-45IU/L	29.0(25.5-35.5)	29.0(26.0-34.0)	29.0(25.0-35.0)	29.0(26.0-35.0)	0.896		36.0(26.8-49.8)	29.5(27.5-33.5)	31.0(27.0-36.0)	31.0(27.0-36.0)	0.037	0.005
	C reactive protein ,0-6mg/L	6.8(3.2-18.9)	5.1(3.1-12.6)	7.1(3.8-17.1)	6.5(3.6-16.1)	0.023		13.6(3.6-25.7)	5.0(3.4-13.6)	7.6(3.315.4)	6.6(3.5-17.9)	0.545532	0.873
	Globulin,20-40g/mL	23.6(22.2-27.1)	24.9(22.1-26.8)	24.6(22.4-27.3)	24.6(22.3-27.1)	0.79		26.5(23.5-30.7)	24.9(22.4-28.4)	25.2(22.5-27.1)	25.2(22.6-28.3)	0.551	0.168
	B-type natriuretic peptide,0-100pg/mL	15.8(15.6-28.8)	18.6(17.4-21.2)	13.8(11.6-16.7)	15.2(11.7-18.6)	0.135471		18.3(12.2-130.8)	25.05(13.9-38.7)	21.4(15.3-37.5)	18.8(14.5-43.7)	0.951	0.016
	Myoglobin,0-146.9ng/mL	39.6(30.2-45.3)	32.3(29.3-52.9)	31.0(21.3-42.6)	28.3(21.3-39.3)	0.243		77.0(42.2-200.7)	49.05(34.7-88.4)	51(33.35-83.05)	35.6(24.6-64.5)	0.605	<0.001
	Creatine kinase‐MB,0-4ng/mL	0.8(0.6-0.9)	0.8(0.6-1.2)	0.6(0.3-1.05)	0.4(0.3-0.6)	0.238		0.8(0.6-1.6）	1.0(0.5-1.2)	0.8(0.6-1.2)	0.6(0.4-1.0)	0.907761	<0.001
	Hypersensitive troponin I,0-34.2pg/mL	4.7(3.2-10.2)	2.7(1.6-5.5)	1.6(0.2-5.8)	3.6(1.3-10.8)	0.241		8.2(2.6-24.9)	8.0(2.4-17.3)	4.8(2.3-11.2)	5.9(1.6-11.0)	0.587	<0.001
Clinical classification
	Mild	7	24	109	140	0.087		2	6	10	18	0.007	<0.001
	Moderate	33	65	238	336			12	18	46	76
	Severe	1	0	1	2			3	0	0	3
	Critical	0	0	0	0			2	2	1	5
Conversiontime, days, Median(IQR)		19.00(16.50-21.50)	20.00(16.00-22.00)	18.00(15.00-21.00)	18.00(15.00-22.00)	0.01		19.00(15.00-26.00)	20.00(15.00-22.00)	18.00(15.00-22.00)	19.00(15.00-23.00)	0.621	0.216
